# Supplementary material for: AB-IPI: A Clinicopathological Prognostic Score Integrating Host Fitness and Tumor Biology in Diffuse Large B-Cell Lymphoma
Source: Research Square preprint supplement (doi:10.21203/rs.3.rs-8451544/v1), 2026-01-12

Supplementary Figure 1. Survival outcomes in the entire cohort.

Kaplan-Meier estimates of (A) progression-free survival (PFS) and (B) overall survival (OS) for all 289 patients included in the study. The number at risk at each time point (years) is shown below the graphs.


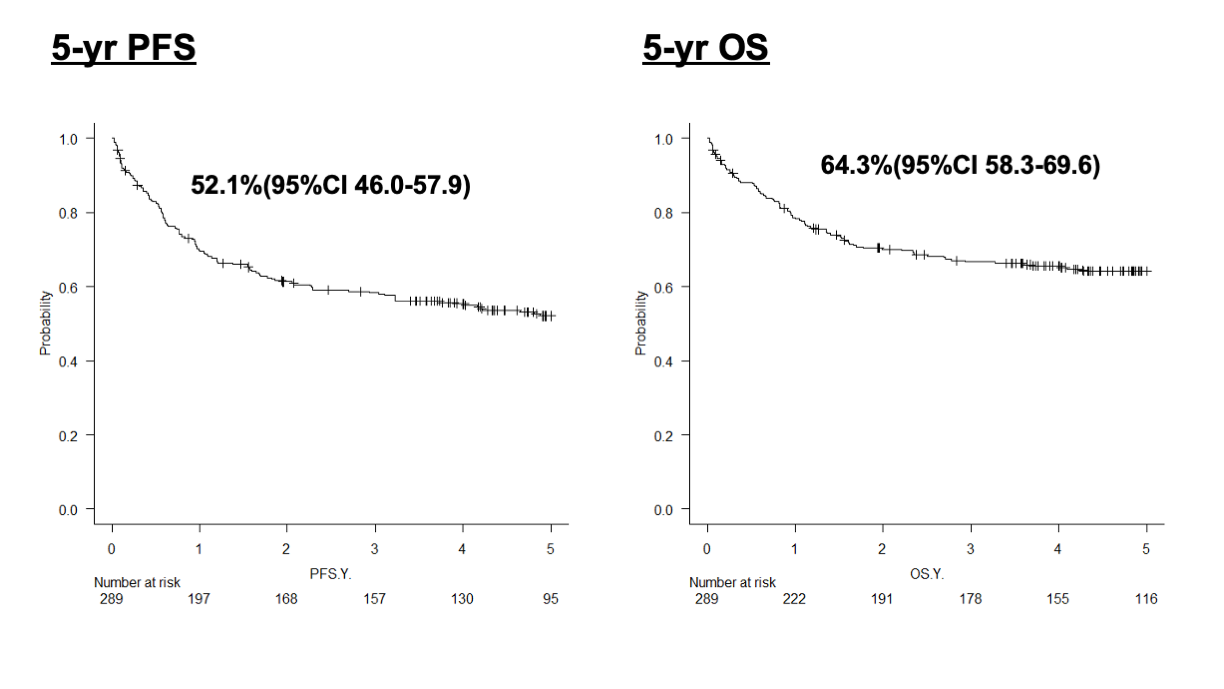


Supplementary Figure 2.

Receiver operating characteristic (ROC) curve analysis for serum albumin levels. The optimal cutoff value for predicting overall survival was determined to be 3.6 g/dL based on the Youden index, yielding a sensitivity of 63.5% and a specificity of 74.1%.


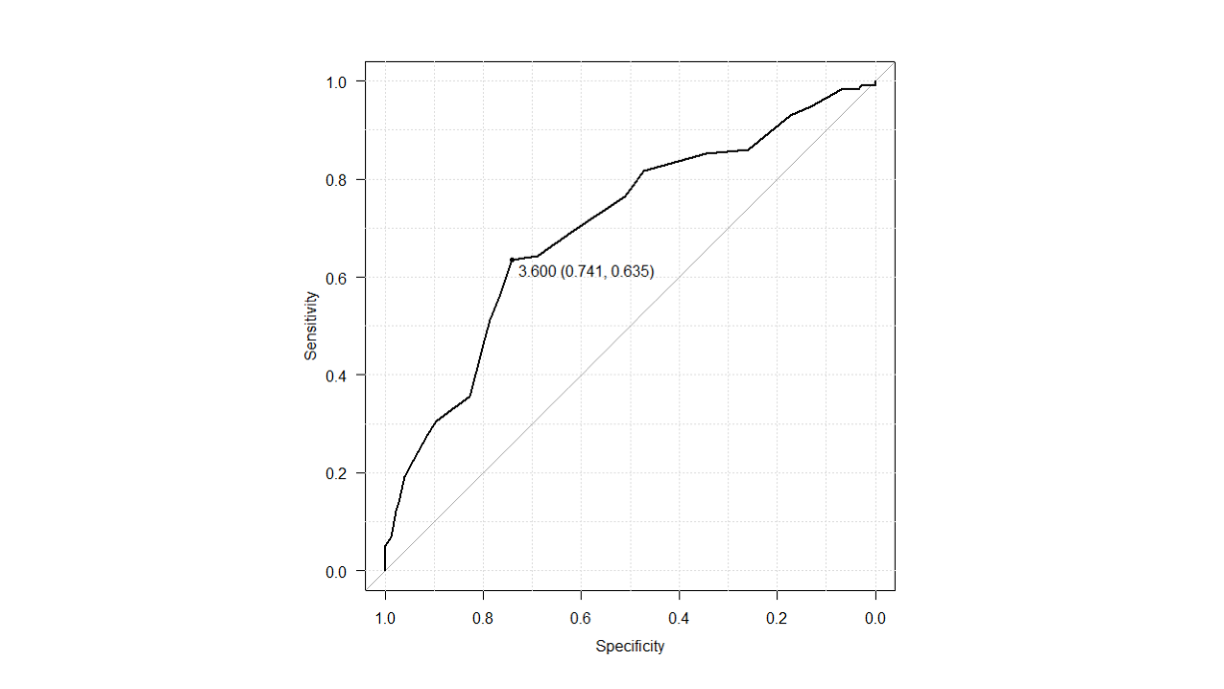

Supplement: Supplementary file 1 [file e0a50a5b6388e0253f5b1145.docx]
